## PANMIXIA IN ALASKAN POPULATIONS OF THE SNOW CRAB *CHIONOECETES OPILIO* (MALACOSTRACA: DECAPODA) IN THE BERING, CHUKCHI, AND BEAUFORT SEAS

Gregory T. Albrecht<sup>1</sup>, Alexandra E. Valentin<sup>2</sup>, Kris J. Hundertmark<sup>3</sup>, and Sarah M. Hardy<sup>1,\*</sup>

<sup>1</sup> University of Alaska, Fairbanks, School of Fisheries and Ocean Sciences, P.O. Box 757220, Fairbanks, AK 99775, USA

<sup>2</sup> Institut Maurice-Lamontagne, Pêches et Océans Canada, 850 route de la Mer, Mont-Joli, Québec, Canada G5H 3Z4

<sup>3</sup> University of Alaska, Fairbanks, Institute of Arctic Biology and Department of Biology and Wildlife, P.O. Box 757000, Fairbanks, AK 99775, USA

### ABSTRACT

Decreasing sea ice in the Arctic is expected to impact marine ecosystems, and to lead to increased human activity in the form of shipping traffic, fishing pressure, and mineral resource exploration and extraction. In the face of these pressures, we examine genetic population structure in the snow crab *Chionoecetes opilio* (Fabricius, 1788), throughout its distribution in Alaskan waters, to determine degrees of population connectivity between the Arctic and more southerly portions of the species' range. Snow crabs are widely distributed on the high-latitude continental shelves of North America, where they support a valuable commercial fishery in the United States and Canada. Fishing pressure in United States waters is currently concentrated in the Bering Sea, but large populations of snow crab also occur farther north in the Chukchi and Beaufort Seas. These northern stocks are not well studied, and not yet targeted by fisheries, although commercial-sized individuals were recently reported in areas of the Western Beaufort Sea. We used seven polymorphic microsatellite markers to examine tissue samples from 573 individual crabs collected at 12 sampling locations distributed across the Bering, Chukchi, and Beaufort Seas. These data indicate that Alaskan snow crabs constitute one large, panmictic population. Connectivity between fishery areas in the south and unexploited regions farther north thus appears to be substantial, perhaps due to a lengthy larval dispersal period and highly mobile adult population.

**KEY WORDS:** Beaufort Sea, *Chionoecetes opilio*, Chukchi Sea, fisheries, panmixia, snow crab

DOI: 10.1163/1937240X-00002197

### INTRODUCTION

Changing climate in the Arctic is manifesting as warming temperatures and changing sea ice conditions, with consequences for marine communities (Grebmeier, 2012). Moreover, declining sea ice coverage is opening up areas of the Arctic shelves to increased human presence in the form of shipping traffic and petroleum resource extraction activities, and stimulating interest in potential exploitation of new fisheries resources. The snow crab, *Chionoecetes opilio* (Fabricius, 1788), represents one such commercially valuable species with the potential to be impacted by both fishing pressure and habitat disturbance in the Alaskan Arctic. Snow crabs occur throughout high-latitude continental-shelf regions of the North Pacific and Northwest Atlantic, and recent surveys have also documented the presence of an expanding non-native population in the Barents Sea (Alvsvåg et al., 2009; Agnalt et al., 2011). In addition, changing temperatures appear to be driving a northward range contraction in the Pacific-Arctic region (Dionne et al., 2003; Orensanz et al., 2004), as evidenced by substantial increases in snow-crab biomass and abundance in the Chukchi Sea since the 1970s (Bluhm et al., 2009). This range shift may increase

population sizes in the Chukchi and Beaufort Seas, and alter dynamics of dispersal and migration in the region.

Lucrative snow-crab fisheries exist in northeastern Canada, Greenland and the United States. The US snow-crab fishery is currently limited to the eastern Bering Sea (EBS), and represents the largest and most valuable crab fishery in the country (over \$155 million ex-vessel value; NPFMC, 2010). Harvest increased during the 1980s as catches of the more valuable Tanner crab, *Chionoecetes bairdi* Rathbun, 1924, began to decline (Bowers et al., 2008). Since that time, EBS stocks have undergone large inter-annual fluctuations in population size, and were declared overfished in 1999 (NPFMC, 2010).

EBS stocks are currently managed as one panmictic unit with a single harvest quota, although harvest and population dynamics are tracked in two distinct sub-districts (divided at 173°W) (Bowers et al., 2008). Mature females in the Bering Sea undergo an ontogenetic migration, moving into deeper water in a direction that is generally "upstream" with respect to local currents that may disperse larvae (Ernst et al., 2005). Males may also migrate to deeper waters following the terminal molt (Otto, 1998). Although these patterns could potentially influence patterns of gene flow, previous investigations of population structure using allozymes

\* Corresponding author; e-mail: smhardy@alaska.edu

supported the current management scheme, indicating little structure within the EBS region (Merkouris et al., 1998).

Relatively little attention has been paid to snow crab stocks in the Chukchi and Beaufort Seas, where large aggregations also occur (Paul et al., 1997; Bluhm et al., 2009; Rand and Logerwell, 2011). These unexplored populations may be sources or sinks for genetic exchange with other, more intensively fished populations farther south, or farther east in Canadian waters. Movement patterns within the Chukchi and Beaufort Seas are not known; however, migrations to deeper water may be evidenced by the discovery of larger individuals (up to 119 mm carapace width, CW) at depths up to 478 m in the Beaufort Sea (Rand and Logerwell, 2011). This discovery was significant because a latitudinal cline in size-at-maturity has been well-documented in both Pacific and Atlantic populations, with morphometrically mature Chukchi Sea snow crabs typically only reaching 40 to 70 mm CW (Somerton, 1981; Burmeister and Sainte-Marie, 2010).

The large population size, degree of adult mobility, and lengthy planktonic larval period of snow crab (on the order of three to four months; Incze et al., 1984, 1987; Kogane et al., 2005) may be expected to create a genetically

homogenous population over a relatively large area. Again, an earlier allozyme study did fail to detect population structure in the Bering Sea (Merkouris et al., 1998). Allozymes are less polymorphic than microsatellites, and may thus fail to detect structure in large populations. Nonetheless, microsatellite-based studies of snow crab populations in northeastern Canada also failed to detect significant population structure over similar spatial scales (Puebla et al., 2008). Genetic tools have not been applied in examining connectivity between the EBS and northern populations in Alaska, but complex ontogenetic migrations (Orensanz et al., 2004; Ernst et al., 2005) and possible hydrographic retention of larvae in some areas of the Bering Sea (Parada et al., 2010) may generate more population structure than has been accounted for in current management strategies. Alternatively, the lengthy planktonic period and predominantly northward flow in the Pacific-Arctic region (Winsor and Chapman, 2004) could be sufficient to homogenize genetic population structure throughout Alaskan waters (Fig. 1). We explore these two scenarios using microsatellite techniques to examine population structure of snow crabs collected throughout the Bering, Chukchi, and Beaufort Seas, and determine whether genetically distinct subpopulations exist despite the

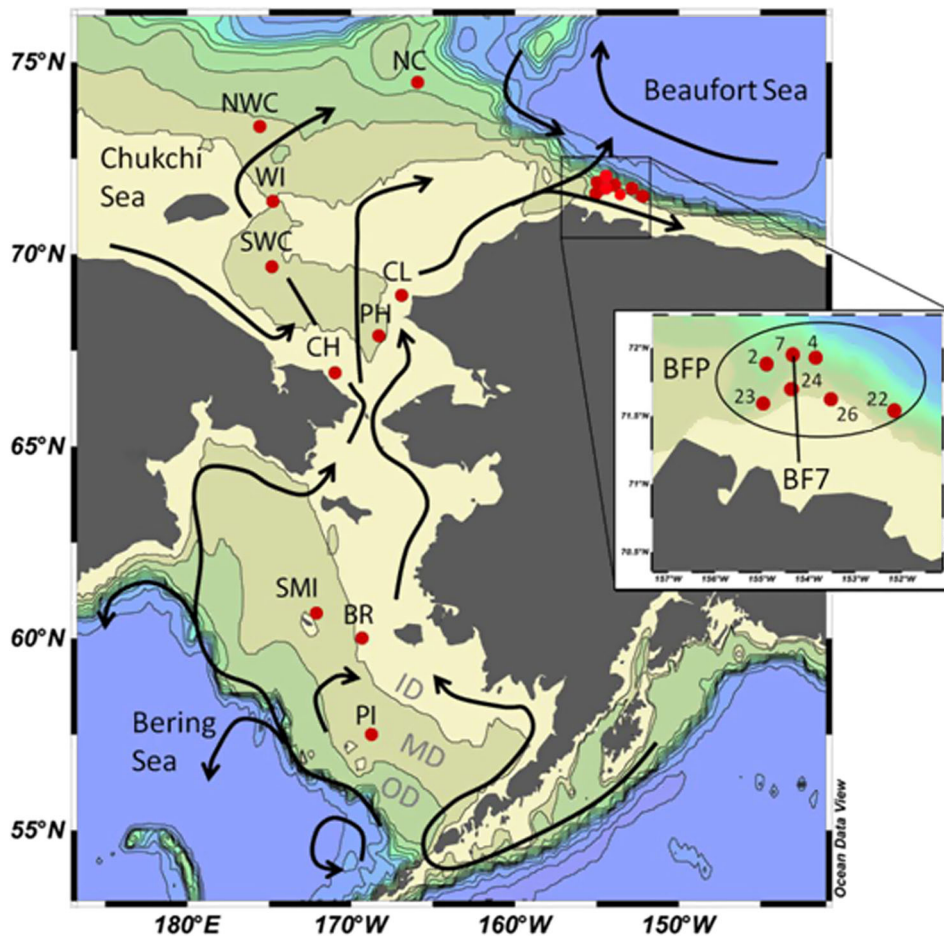

Fig. 1. Map showing sample locations (red circles). Station BFP (inset) in the Beaufort Sea is comprised of samples pooled from sites 2, 4, 22, 23, 24 and 26 (site numbers correspond to Rand and Logerwell, 2011). Idealized oceanographic flow through the study area (based on Stabeno et al., 2001; Weingartner et al., 2005; Parada et al., 2010) shown by black arrows. Site 7 (BF7) was not pooled due to the presence of larger-sized individuals at this site. This figure is published in colour in the online edition of this journal, which can be accessed via <http://booksandjournals.brillonline.com/content/1937240x>.

absence of obvious physical barriers to movement and dispersal. Specifically, we test the null hypothesis that snow crabs form a panmictic population throughout the region.

## MATERIALS AND METHODS

### Sample Collections

Samples of snow crab muscle tissue were collected opportunistically on a series of cruises in the Bering, Chukchi and Beaufort Seas from 2008 to 2010 (Fig. 1). Female crabs were specifically targeted for collection because snow crabs in the EBS are known to undergo sex-specific ontogenetic migrations (Ernst et al., 2005). Interpretation of results from this study could thus be complicated by these sex-specific patterns, so we attempted to eliminate sex as a variable. However, because samples were collected opportunistically, sample numbers were low at some locations. We thus pooled males and females for one location in the Bering Sea (station PI) and one location in the Chukchi Sea (station NC), and at all stations in the Beaufort Sea (Table 1; Fig. 1).

Beaufort Sea samples ( $n = 105$ ) were collected in August 2008 on a US Minerals Management Service expedition aboard the *F/V Ocean Explorer*, using an 83-112 eastern otter trawl (for additional sampling details, see Rand and Logerwell, 2011). Whole crabs were frozen at  $-20^{\circ}\text{C}$  aboard the vessel and transferred to  $-80^{\circ}\text{C}$  in the home laboratory prior to tissue sub-sampling. In addition to pooling males and females, samples from six Beaufort Sea stations (2, 4, 22, 23, 24 and 26) were pooled due to low sample numbers. These samples included a range of different-sized individuals from depths ranging from 49 to 478 m, but all samples were collected in a relatively localized area (station BFP, Fig. 1). Station BF7 was also located near the pooled stations, but samples from BF7 were treated separately in our analyses because these crabs were notably larger in size ( $88.5 \pm 15.0$  mm, compared to  $34.6 \pm 15.2$  mm avg. carapace width (CW)). Despite their larger size, these crabs had similar shell condition as the smaller individuals from nearby sites, suggesting they were of roughly the same age (Ernst et al., 2005; Fonseca et al., 2008). Thus, we were interested in determining whether these larger crabs were genetically distinct from the smaller individuals found at all the other sites.

Chukchi Sea samples ( $n = 268$ ) were collected in September 2009 during the Russian-American Long-term Census of the Arctic (RUSALCA) cruise aboard the *R/V Professor Khromov*, using both otter and plumb-staff beam trawls. Crabs were again frozen whole aboard the vessel and sub-sampled in the home laboratory. As many as 50 females were collected from each of seven stations to encompass a broad area (Fig. 1, Table 1). The majority of individuals collected (92.4% of the females) were immature, based on width of the abdominal flap.

Bering Sea samples ( $n = 200$ ) were collected in July 2010 aboard the National Marine Fisheries Service (NMFS) annual trawl survey cruises (for additional sampling details, see Chilton et al., 2011). Sampling was conducted aboard the *F/V Aldebaran* and the *F/V Alaska Knight* using 83-112 eastern otter trawls. Three sampling locations were chosen to encompass a broad area in the region of maximum snow crab density. Primiparous females (one molt prior to morphometric maturity) were targeted at each of three sites in order to sample an approximate age range that was consistent with samples previously collected in the Chukchi Sea. A 2.5-cm section of the 4th walking leg was sampled from each live crab on board ship, and preserved in 95% ethanol. Measurements of carapace width (Table 1) were taken at time of sampling and data were obtained from NMFS data logs.

### DNA Extraction and Genotyping

Genomic DNA was extracted from tissues using Omega Bio-Tek E.Z.N.A.® and Qiagen DNeasy® extraction kits. Seven published microsatellite loci were successfully amplified: *Cop2*, *Cop3*, *Cop4*, *Cop3-4II*, *Cop24-3* and *Cop11* (Puebla et al., 2003) and *ECO106* (An et al., 2007). Attempts to amplify and analyze five additional loci (*Cop4-1* and *Cop77*; Puebla et al. 2003, and *KC030*, *KC0181* and *KC0235*; An et al., 2007) were unsuccessful.

PCR amplifications contained about 20-100 ng template DNA, 0.5  $\mu\text{M}$  each primer, Qiagen hot-start *Taq* and 2 $\times$  Multiplex PCR Master Mix (containing a final concentration of 3 mM  $\text{MgCl}_2$ ), for a final volume of 10  $\mu\text{l}$ . PCR conditions consisted of a 30 minute denaturation at  $94^{\circ}\text{C}$ , followed by 40 cycles of 30 seconds denaturing at  $96^{\circ}\text{C}$ , 50 seconds annealing at  $55^{\circ}\text{C}$ , and 1 minute of extension at  $72^{\circ}\text{C}$  with a final extension time

of 20 minutes at  $72^{\circ}\text{C}$ . Three PCR multiplexes consisting of 2 loci each (*Cop113* and *Cop3-4II*, *Cop2* and *ECO106*, *Cop3* and *Cop4*) were used; however, *Cop24-3* was run independently due to interference when paired with any other locus. Final PCR product was submitted to the Yale DNA Analysis Facility (available online at: <http://dna-analysis.research.yale.edu/>) for capillary electrophoresis on a 3730xl 96 Genetic Analyzer using Gene Scan LIZ-500 internal size standard. All samples were amplified, analyzed, and scored a minimum of two times to ensure accurate genotyping with a range of 0-8.5% missing data per locus. Alleles were scored using GeneMapper® software (version 3.7. Applied Biosystems), and all scores were visually checked to confirm binning.

### Statistical Analysis

The data set containing genotypes for all 7 microsatellite loci (12 sampling locations,  $n = 573$  individuals) was analyzed with MICRO-CHECKER (Van Oosterhout et al., 2004) to detect scoring incongruities and possible null alleles. Number of alleles ( $N_A$ ) and allelic richness ( $A$ ) were calculated for the 12 samples (i.e., geographic locations) at each locus, using the software FSTAT v. 2.9.3.2 (Goudet, 2001). A Wilcoxon signed-rank test was carried out in the statistical software package JMP (SAS institute, Cary, NC, USA) to test for significance in allelic richness between samples. Observed ( $H_O$ ) and expected ( $H_E$ ) heterozygosities were calculated for each sample at each locus using the software ARLEQUIN v. 3.5.1.3 (Excoffier and Lischer, 2010). Heterozygosities over loci by sample and over samples by locus were computed using the software GENETIX v.4.05.2 (Belkhir et al., 1996-2004) and FSTAT v. 2.9.3.2 (Goudet, 2001), respectively. FSTAT was also used to estimate  $F_{IS}$  (a measure of the heterozygote deficit within samples) for each locus, and across loci for each sample.  $F_{IS}$  was then tested (1000 randomizations) for significant differences from zero to assess compliance with Hardy-Weinberg equilibrium. Linkage disequilibrium (non-random association of alleles at different loci, e.g. due to physical linkage) was tested within samples between all pairs of loci using FSTAT. All probability values were adjusted for multiple comparison tests using sequential Bonferroni adjustments (Rice, 1989).

Pairwise genetic differentiation was quantified for each sample (station) pair using estimates of pairwise fixation indices ( $F_{ST}$ ) based on variance in allelic frequencies (Weir and Cockerham, 1984). Values were tested for significance, based on 1320 permutations, using FSTAT. All probability values were adjusted for multiple comparison tests using sequential Bonferroni adjustments (Rice, 1989). Jost's (2008) measure of differentiation ( $D$ ), which accounts for effective allele frequencies and, unlike  $F_{ST}$ , is not constrained by heterozygosity, was also calculated overall and between pairs of samples using SMOGD (Crawford, 2010). Finally, a hierarchical analysis of molecular variance (AMOVA) was carried out to partition genetic diversity among the three geographic regions (Bering Sea, Chukchi Sea and Beaufort Sea), among samples within regions, and within samples, using ARLEQUIN v. 3.5.1.3.

To test the hypothesis of panmixia across the study region, a Bayesian clustering approach was implemented using the program STRUCTURE (version 2.3.4; Pritchard et al., 2000). All possible numbers of populations ( $K$ ) from 1 (panmixia) to 13 (distinct population at each sampling site) were tested using the admixture and correlated allele-frequency models. For each value of  $K$ , five runs were performed with 500 000 Markov Chain Monte Carlo (MCMC) repetitions following a 500 000 repetition burn-in period. The entire procedure was performed twice, i.e. with and without the assistance of sample geographic information (Hubisz et al., 2009). The most likely number of populations was determined based on the *ad hoc* likelihood measures  $L(K)$  (Pritchard et al., 2000) and  $\Delta K$  (Evanno et al., 2005) using the web-based program STRUCTURE HARVESTER (Earl and von Holdt, 2012).

## RESULTS

### Descriptive Statistics and Population Differentiation

The seven microsatellite markers were highly polymorphic, with alleles per locus ranging from 12 (*Cop4*) to 41 (*ECO106*); mean  $\pm$  SD =  $24.6 \pm 8.8$ ; Table 2). Mean within-sample allelic richness across loci (based on the smallest sample size  $n = 23$ ) ranged from 12.5 to 14.4 (mean =  $13.6 \pm 0.5$ ; Table 1). Allelic richness did not significantly differ between any two samples (Wilcoxon signed-rank test,

Table 1. Sample collection information and descriptive statistics. Sampling location abbreviations correspond to those in Fig. 1; (N) number of males (m) and females (f) analyzed from each station; (CW) mean carapace width of all individuals collected at each sampling site  $\pm$  standard deviation; ( $N_A$ ) mean number of alleles by locus; (A) allelic richness for a common minimum sample size of 23; ( $H_O$ ) observed heterozygosity; ( $H_S$ ) gene diversity; ( $F_{IS}$ ) individual diversity relative to the sample, with average CW not available for station BR; however, all females collected in the Bering Sea were between 30-65 mm CW and considered to be immature. \* Significant  $F_{IS}$  values after correction for multiple tests.

| Sampling location   | N        | Depth (m) | Lat; Long                       | CW (mm)         | $N_A$          | A              | $H_O$             | $H_S$             | $F_{IS}$          |
|---------------------|----------|-----------|---------------------------------|-----------------|----------------|----------------|-------------------|-------------------|-------------------|
| <b>Bering Sea</b>   |          |           |                                 |                 |                |                |                   |                   |                   |
| Pribilof Islands    | 77f, 23m | 71        | 57.50N; 168.75E                 | 50.5 $\pm$ 6.1  | 19.6           | 13.9           | 0.762             | 0.824             | 0.076*            |
| Bering Sea Shelf    | 50f      | 47        | 60.01N; 169.33E                 | *               | 16.9           | 13.9           | 0.790             | 0.806             | 0.020             |
| Saint Matthew Is.   | 50f      | 61        | 60.66N; 172.12E                 | 43.9 $\pm$ 4.0  | 16.6           | 13.5           | 0.736             | 0.804             | 0.085*            |
| <b>Chukchi Sea</b>  |          |           |                                 |                 |                |                |                   |                   |                   |
| Chukotka Coast      | 50f      | 53        | 66.56N; 170.59E                 | 33.5 $\pm$ 5.7  | 17.0           | 13.6           | 0.757             | 0.797             | 0.051             |
| Point Hope          | 29f      | 57        | 67.88N; 168.31E                 | 46.3 $\pm$ 5.1  | 14.6           | 13.7           | 0.721             | 0.809             | 0.111*            |
| Cape Lisburne       | 39f      | 47        | 68.57N; 166.55E                 | 35.4 $\pm$ 4.5  | 16.6           | 14.0           | 0.765             | 0.812             | 0.058             |
| SW Chukchi Shelf    | 50f      | 54        | 69.41N; 174.51E                 | 44.1 $\pm$ 5.9  | 16.7           | 13.7           | 0.786             | 0.807             | 0.026             |
| Wrangel Island      | 26f      | 86        | 71.24N; 174.47E                 | 45.5 $\pm$ 5.6  | 14.7           | 14.4           | 0.793             | 0.807             | 0.017             |
| NW Chukchi Shelf    | 50f      | 146       | 73.21N; 175.34E                 | 35.6 $\pm$ 4.4  | 15.9           | 13.4           | 0.793             | 0.821             | 0.033             |
| N Chukchi Shelf     | 7f, 17m  | 350       | 74.30N; 165.57E                 | 36.1 $\pm$ 15.3 | 13.7           | 13.5           | 0.815             | 0.810             | -0.007            |
| <b>Beaufort Sea</b> |          |           |                                 |                 |                |                |                   |                   |                   |
| Site 7              | 8f, 65m  | 334       | 71.98N; 154.41W                 | 88.5 $\pm$ 15.0 | 18.1           | 13.2           | 0.780             | 0.807             | 0.034             |
| Other sites pooled  | 9f, 23m  | 45-478    | 71.55-71.90N;<br>152.20-155.05W | 34.6 $\pm$ 15.2 | 13.7           | 12.5           | 0.772             | 0.791             | 0.024             |
| Mean $\pm$ SD       |          |           |                                 |                 | 16.2 $\pm$ 1.8 | 13.6 $\pm$ 0.5 | 0.773 $\pm$ 0.026 | 0.808 $\pm$ 0.009 | 0.044 $\pm$ 0.033 |

Table 2. Characteristics of microsatellite loci; observed heterozygosity ( $H_O$ ); genetic diversity ( $H_S$ ); individual diversity relative to the subpopulation (in this case sampling site) with standard error estimated by jackknifing over loci ( $F_{IS}$ ); subpopulation diversity relative to the total population ( $F_{ST}$ ); ( $D$ ) Jost's (2008) measure of differentiation;  $\pm$  standard deviation. Negative  $F_{ST}$  and  $D$  values were replaced by zeros.

| Locus           | Alleles        | Size range (bp) | $H_O$             | $H_S$             | $F_{IS}$          | $F_{ST}$           | $D$               |
|-----------------|----------------|-----------------|-------------------|-------------------|-------------------|--------------------|-------------------|
| <i>Cop2</i>     | 24             | 291-341         | 0.836             | 0.841             | 0.006             | <0.001             | 0                 |
| <i>Cop3</i>     | 21             | 210-318         | 0.793             | 0.861             | 0.097             | <0.001             | 0.007             |
| <i>Cop4</i>     | 12             | 211-259         | 0.232             | 0.266             | 0.115             | 0                  | 0                 |
| <i>Cop3-4II</i> | 22             | 117-209         | 0.858             | 0.910             | 0.064             | 0.001              | 0.015             |
| <i>Cop24-3</i>  | 27             | 145-253         | 0.908             | 0.925             | 0.023             | 0.002              | 0.037             |
| <i>Cop113</i>   | 24             | 114-170         | 0.886             | 0.893             | 0.018             | 0                  | 0                 |
| <i>ECO106</i>   | 41             | 187-271         | 0.895             | 0.961             | 0.0659            | 0.001              | 0.056             |
| Mean/Global     | 24.6 $\pm$ 8.8 | –               | 0.773 $\pm$ 0.242 | 0.808 $\pm$ 0.242 | 0.047 $\pm$ 0.013 | <0.001 $\pm$ 0.001 | 0.017 $\pm$ 0.021 |

data not shown,  $p = 0.12$ ). Overall observed heterozygosity ( $H_O$ ) at each locus ranged from 0.232 (*Cop4*) to 0.908 (*Cop24-3*; mean = 0.773  $\pm$  0.242; Table 2). Observed heterozygosity averaged across all loci for each sampling station ranged from 0.721 (sample PH) to 0.815 (sample NC; mean = 0.773  $\pm$  0.026; Table 1).

Significant departure from Hardy-Weinberg equilibrium (HWE) was found in only one out of 84 possible population-locus pairings (sample PI at locus *Cop3*), after correction for multiple tests (see the Appendix, which can be found in the online edition of this journal, which can be accessed via <http://booksandjournals.brillonline.com/content/1937240x>); significant departures from HWE were observed in three samples when statistical tests were computed across loci (Table 1). All significant tests were due to heterozygote deficits. MICRO-CHECKER did not suggest technical problems related to stuttering or large allele dropout. These departures are thus likely due to random error associated with genotyping and null alleles. Tests for linkage disequilibrium (LD) revealed no significant results in any of the 252 tests at each locus combination per sample, after correction for multiple tests (not shown).

The mean (global)  $F_{ST}$  value across loci (<0.001) and the mean Jost's (2008) measure of differentiation ( $D$ ) across loci (0.017) were both low (Table 2). Pairwise indices of differentiation ( $F_{ST}$ ) between samples ranged from 0 to 0.005 (mean = 0.0009  $\pm$  0.001), and no value was significantly different from zero after correction for multiple

tests (Table 3). Pairwise  $D$  values ranged from 0 to 0.018 (mean = 0.003  $\pm$  0.005), indicating that the two most divergent samples differed by less than 2% in actual relative allelic frequencies. The AMOVA analysis (Table 4) detected no significant genetic differences ( $p = 0.476$ ) among the three regions (the Bering Sea, the Chukchi Sea, and the Beaufort Sea), as well as among sites within these regions ( $p = 0.718$ ). Based on  $L(K)$ , results of the Bayesian clustering analysis performed in STRUCTURE indicated the most likely number of clusters (putative populations) is one;  $K = 1$  showed the highest value (mean = -18568.86; SD = 0.22) and likelihood values decreased with increasing values of  $K$ . The delta- $K$  method indicated  $K = 3$ , but this method is incapable of evaluating the possibility that  $K = 1$ , and examination of q-score plots (not shown) clearly favored a conclusion of  $K = 1$ . The results were similar whether or not sampling locations were used to assist the model (not shown). Taken together, the results strongly suggest that Alaskan snow crabs constitute one large, panmictic population.

## DISCUSSION

Analysis of seven microsatellite loci revealed genetic homogeneity in snow crab populations throughout the Alaska region. Results are consistent among all loci and locations sampled, and thus considered robust. An earlier study by Puebla et al. (2008) employed six of the same microsatellite

Table 3. Pairwise  $F_{ST}$  (above the diagonal) and  $D$  (below the diagonal) values between sampling sites. Negative values were replaced by zeros. No  $F_{ST}$  values were significant.

|     | PI      | BR      | SMI     | CH      | PH      | CL      | SWC     | WI     | NWC    | NC     | BF7     | BFP    |
|-----|---------|---------|---------|---------|---------|---------|---------|--------|--------|--------|---------|--------|
| PI  | *       | 0.0020  | 0       | 0.0001  | 0       | 0.0011  | 0.0006  | 0      | 0.0007 | 0      | 0       | 0.0008 |
| BR  | 0.0043  | *       | 0       | 0       | 0.0025  | 0.0003  | 0.0025  | 0      | 0.0019 | 0.0012 | 0.0030  | 0      |
| SMI | <0.0001 | 0.0010  | *       | 0       | 0       | 0.0005  | 0       | 0      | 0      | 0      | 0       | 0.0027 |
| CH  | <0.0001 | <0.0001 | 0       | *       | 0       | 0.0024  | 0.0004  | 0.0017 | 0.0026 | 0.0023 | 0.0022  | 0.0039 |
| PH  | 0       | 0.0055  | 0       | 0       | *       | 0       | 0.0001  | 0      | 0      | 0      | 0       | 0.0039 |
| CL  | 0.0043  | 0.0013  | 0.0069  | 0.0129  | <0.0001 | *       | <0.0001 | 0      | 0      | 0.0009 | 0.0018  | 0.0046 |
| SWC | <0.0001 | 0.0111  | 0       | <0.0001 | 0.0011  | 0.0013  | *       | 0      | 0      | 0.0007 | <0.0001 | 0.0007 |
| WI  | 0       | 0       | <0.0001 | 0.0002  | 0       | 0       | 0       | *      | 0      | 0      | 0       | 0      |
| NWC | 0.0003  | 0.0081  | 0.0010  | 0.0015  | <0.0001 | <0.0001 | 0       | 0      | *      | 0      | 0       | 0.0033 |
| NC  | 0.0002  | 0.0035  | 0.0004  | 0.0028  | 0       | 0.0060  | 0.0050  | 0      | 0      | *      | 0       | 0.0050 |
| BF7 | 0       | 0.0077  | 0       | 0.0002  | 0       | 0.0073  | 0.0002  | 0      | 0      | 0      | *       | 0.0024 |
| BFP | 0.0033  | 0.0003  | 0.0116  | 0.0129  | 0.0149  | 0.0180  | 0.0022  | 0.0011 | 0.0098 | 0.0163 | 0.0078  | *      |

Table 4. Hierarchical AMOVA partitioning genetic diversity across the three geographic regions sampled (Bering, Chukchi and Beaufort Seas), based on the seven microsatellite loci. Results shown indicated variance components and percentage of variation explained by different levels of population structure, as well as  $F$ -statistics and probability of significance.

| Source of variation              | df   | Sum of squares | Variance components | Percentage of variation | Fixation index ( $F_{ST}$ ) | $P$ (based on 1023 permutations) |
|----------------------------------|------|----------------|---------------------|-------------------------|-----------------------------|----------------------------------|
| Among regions                    | 2    | 4.61           | 0.00006             | 0.00                    | 0.00003                     | 0.476 ± 0.015                    |
| Among populations within regions | 9    | 20.57          | -0.00009            | 0.00                    | -0.00004                    | 0.718 ± 0.014                    |
| Within populations               | 1134 | 2601.82        | 2.29                | 100.00                  | -0.00001                    | 0.718 ± 0.015                    |
| Total                            | 1145 | 2627.01        | 2.29                |                         |                             |                                  |

markers used here, along with two additional loci, in examining population structure of Atlantic snow crab populations in Northeast Canada and Greenland. Genetic homogeneity was found within each of these regions, although Canadian populations showed evidence of differentiation from those in Greenland. The global mean  $F_{ST}$  value reported by Puebla et al. was higher than in this study (0.011, compared to <0.001) and highly significant. However, all of the variation was attributed to differences between Atlantic Canada and Greenland sites; the mean  $F_{ST}$  value within Atlantic Canada samples (0.001) was comparable to the value reported here for Alaska populations.

Snow-crab populations appear to be genetically homogeneous, not only on regional scales, but over much larger scales as well. Albrecht (2011) compared the Alaskan population (data reported here, all sites pooled) to those in Atlantic Canada and Greenland (data from Puebla et al., 2008) using five microsatellite loci, and found low levels of differentiation between populations in Alaska and Atlantic Canada. Values of Jost's (2008)  $D$  indicated greater genetic similarity between Alaska and Atlantic Canada ( $D = 0.0195$ ) than between Canada and Greenland ( $D = 0.1956$ ). Similar evidence of connectivity between Pacific and Atlantic populations was also shown using allozyme markers (Merkouris et al., 1998). This finding is particularly noteworthy considering snow crabs are not known to occur across most of the Canadian Arctic coastline. Snow crab occur on the western Beaufort Sea shelf and slope (Rand and Logerwell, 2011), with the farthest-east reports dating back to the 1960s from the Mackenzie River delta region (Atkinson and Wacasey, 1989). The Atlantic population only extends as far west as the Labrador region, and along the southwestern coast of Greenland (Squires, 1990).

In taxa with long-lived planktonic larvae such as the snow crab, length of the larval period is widely assumed to govern dispersal distance, and extensive dispersal distance is often invoked to explain genetic homogeneity over large spatial scales (Palumbi, 1992). In Arctic regions, low temperatures may further prolong the length of the larval period (O'Connor et al., 2007) such that extremely long-range dispersal is possible. A number of Arctic invertebrate taxa with planktonic larvae have shown this pattern (reviewed by Hardy et al., 2011). However, numerous examples can also be cited wherein marine taxa do not conform to this pattern for a variety of reasons, including larval behavior and hydrographic barriers to dispersal (reviewed by Levin, 2006; Cowen and Sponaugle, 2009). Such examples can be found among other crab species in the North Pacific and elsewhere.

Populations of red king crab, *Paralithodes camtschaticus* (Tilesius, 1815) and Tanner crab, *Chionoecetes bairdi*, show evidence of genetic differentiation between Southeast Alaska, Gulf of Alaska and Bering Sea regions, and Tanner crab exhibit some structure even within the EBS (Bunch et al., 1998; Merkouris et al., 1998; Grant et al., 2011; Grant and Cheng, 2012). Regional separation is thought to be caused by oceanographic barriers created by the Aleutian Island chain and the southeastern Alaska archipelago; however, factors influencing genetic population structure of Tanner crab within the EBS are not yet identified. Current patterns and spawning-site fidelity may be responsible (Merkouris et al., 1998), although the same factors should also influence snow crabs, which show no evidence of population structure. Tanner and king crabs do inhabit coastal fjord systems (Taggart et al., 2008), whereas snow crabs are more abundant out on the open shelf; the complex hydrography of these fjord areas may influence gene flow (Grant and Cheng, 2012). Dungeness crabs, *Metacarcinus magister* (Dana, 1852) in fjord systems of British Columbia also show differentiation of local subpopulations in some isolated embayments (Beacham et al., 2008). Domingues et al. (2010) identify hydrographic barriers to dispersal within the broad native range of the shore crab, *Carcinus maenas* (Linnaeus, 1758), which generate regional genetic structuring within European waters.

Contemporary features such as current patterns that serve as barriers to dispersal may generate structure over short time scales, whereas these patterns may also be underlain by deeper genetic structure developing on geological time scales due to, for example, confinement in glacial refugia (Grant and Cheng, 2012). The distribution of Tanner and king crab in nearshore areas may have led to greater influence of glacial cycles on genetic structure, as has been observed in a number of other Arctic taxa (reviewed by Hardy et al., 2011). In contrast, genetic homogeneity of snow crab throughout the Alaska region may be explained by population expansion from the Bering Sea into the Chukchi and Beaufort Seas relatively recently, following the last glacial maximum; a similar phenomenon has been proposed in EBS red king crab (Grant et al., 2011). Merkouris et al. (1998) further suggest a general northward and eastward expansion of the population, pointing to the lower frequency of occurrence of rare alleles and reduced heterozygosity in Atlantic snow crab populations as evidence that these populations may have been founded by immigrants from the Pacific.

## Implications for Fishery Management

Genetic homogeneity found throughout the Alaska region supports the validity of the current management approach for EBS snow crab stock, which is treated as a single panmictic unit. Moreover, Arctic populations in the Beaufort and Chukchi Seas appear to be highly connected to those in the Bering Sea. Our evidence does not suggest that the significantly larger-sized crabs found at station BF7 in the Beaufort Sea are from a distinct population. Rather, exposure to warm waters known to occur at depth in the area (Pickart et al., 2005) may have influenced the size of these crabs (Orensanz et al., 2007; Burmeister and Sainte-Marie, 2010). It is unlikely that distinct snow crab populations remain undiscovered within the Alaska region, given the spatial coverage of sampling achieved here relative to the potential scales of adult migration and larval dispersal (Ernst et al., 2005; Parada et al., 2010). The absence of a clear source-sink relationship between Alaska regions and evidence of extensive genetic exchange suggest northern stocks could persist through local recruitment even if populations continue to decline in the Bering Sea (cf. NPFMC, 2010); reproductive females have been recovered from the Chukchi Sea (Paul et al., 1997; Bluhm et al., 2009 and unpublished data).

A widely distributed, panmictic population is likely to be resilient to local disturbance if recolonization can be facilitated by influx from neighboring locations. However, populations with numerous distinct units are also thought to be more resilient to local disturbance than panmictic populations such as those identified here (Schindler et al., 2010). The enhanced genetic diversity found in more structured populations may confer an advantage, because impacts of a disturbance affecting one localized subpopulation might not be felt by other distinct groups within the region that possess a slightly different genetic make-up.

Evidence of genetic homogeneity in Alaskan snow crabs should still be considered with caution when devising management and/or conservation strategies for this species. Failure to reject the null hypothesis of panmixia does not definitively confirm that populations are extensively demographically connected (Palsbøll et al., 2007). Although high levels of gene flow have been identified as the main source of genetic homogeneity in other crab species (e.g., Sotelo et al., 2008; Domingues et al., 2010), Grant and Cheng (2012) identified recent expansion from ice-age refugia as the source of apparent homogeneity in a subset of Alaskan red king crab populations. The large population size of such species may prevent divergence due to random drift, as has been shown in multiple species of lobsters (e.g., Stamatis et al., 2004; Kenchington et al., 2009). Genetic evidence should thus be corroborated with ecological data to confirm that populations are not demographically isolated.

## ACKNOWLEDGEMENTS

Project funding was provided by the U.S. Department of the Interior Bureau of Ocean Energy Management (BOEM), through the University of Alaska Coastal Marine Institute, a cooperative agreement between the university and BOEM (Alaska Outer Continental Shelf Region Environmental Studies

Program, contract No. 1435-01-02-CA-85294). Graduate student support was also generously provided by the Rasmuson Fisheries Research Center. Alaska Department of Fish and Game and National Marine Fisheries Service 2009 Eastern Bering Sea trawl survey crews and participants of the 2009 RUSALCA cruise and 2008 Minerals Management Service Beaufort Sea Survey cruise generously supported sample collection. Further thanks and acknowledgement are extended to Andres Lopez and Kevin Colson (University of Alaska, Fairbanks), and to Jean-Marie Sévigny and Éric Parent (Department of Fisheries and Oceans, Canada) for their technical advice and expertise.

## REFERENCES

- Agnalt, A.-L., V. Pavlov, K. E. Jørstad, E. Farestveit, and J. Sundet. 2011. The snow crab, *Chionoecetes opilio* (Decapoda, Majoidea, Oregoniidae) in the Barents Sea, pp. 283-300. In, B. S. Galil, P. F. Clark, and J. T. Carlton (eds.), In the Wrong Place – Alien Marine Crustaceans: Distribution, Biology and Impacts. Springer, Dordrecht.
- Albrecht, G. T. 2011. Defining genetic population structure and historical connectivity of snow crab (*Chionoecetes opilio*). MS Thesis, University of Alaska, Fairbanks, AK, 74 pp.
- Alvsvåg, J., A. L. Agnalt, and K. Jørstad. 2009. Evidence for a permanent establishment of the snow crab (*Chionoecetes opilio*) in the Barents Sea. *Biological Invasions* 11: 587-595.
- An, H. S., J. H. Jeong, and J. Y. Park. 2007. New microsatellite markers for the snow crab *Chionoecetes opilio* (Brachyura: Majidae). *Molecular Ecology Notes* 7: 86-88.
- Atkinson, E. G., and J. W. Wacasey. 1989. Benthic invertebrates from the western Canadian Arctic, 1951-1985. *Canadian Data Report of Fisheries and Aquatic Sciences* No. 745, 132 pp.
- Beacham, T. D., J. Supernault, and K. M. Miller. 2008. Population structure of Dungeness crab (*Cancer magister*) in British Columbia. *Journal of Shellfish Research* 27: 901-906.
- Belkhir, K., P. Borsa, L. Chikhi, N. Raufaste, and F. Bonhomme. 1996-2004. GENETIX 4.05, logiciel sous Windows™ pour la génétique des populations. Laboratoire Génome, Populations, Interactions, CNRS UMR 5171, Université de Montpellier II, Montpellier.
- Bluhm, B. A., K. Iken, S. M. Hardy, B. I. Sirenko, and B. A. Holladay. 2009. Community structure of epibenthic megafauna in the Chukchi Sea. *Aquatic Biology* 7: 269-293.
- Bowers, F. R., M. Schwenzfeier, S. Coleman, B. J. Failor-Rounds, K. Milani, K. Herring, M. Salmon, and M. Albert. 2008. Annual management report for the commercial and subsistence shellfish fisheries of the Aleutian Islands, Bering Sea and the Westward Region's Shellfish Observer Program, 2006. Alaska Department of Fish and Game, Fishery Management Report No. 08-02, Anchorage, AK, 242 pp.
- Bunch, T., R. C. Highsmith, and G. F. Shields. 1998. Genetic evidence for dispersal of larvae of Tanner crabs (*Chionoecetes bairdi*) by the Alaskan Coastal Current. *Molecular Marine Biology and Biotechnology* 72: 153-159.
- Burmeister, A., and B. Sainte-Marie. 2010. Pattern and causes of a temperature-dependent gradient of size at terminal moult in snow crab (*Chionoecetes opilio*) along West Greenland. *Polar Biology* 33: 775-788.
- Chilton, E. A., C. E. Armistead, and R. J. Foy. 2011. The 2010 Eastern Bering Sea continental shelf bottom trawl survey: results for commercial crab species. US Department of Commerce, NOAA Technical Memorandum NMFS-AFSC-216, 139 pp.
- Cowen, R. K., and S. Sponaugle. 2009. Larval dispersal and marine population connectivity. *Annual Review of Marine Science* 1: 443-466.
- Crawford, N. G. 2010. SMOGD: software for the measurement of genetic diversity. *Molecular Ecology Resources* 10: 556-557.
- Dana, J. D. 1852. *Conspectus Crustaceorum, &c. Conspectus of the Crustacea of the Exploring Expedition under Capt. Wilkes, U.S.N., including the Crustacea Cancroidea Corystoidea*. *Proceedings of the Academy of Natural Sciences of Philadelphia* 6: 73-86.
- Dionne, M., B. Sainte-Marie, E. Bourget, and D. Gilbert. 2003. Distribution and habitat selection of early benthic stages of snow crab *Chionoecetes opilio*. *Marine Ecology Progress Series* 259: 117-128.
- Domingues, C. P., S. Creer, M. I. Taylor, H. Queiroga, and G. R. Carvalho. 2010. Genetic structure of *Carcinus maenas* within its native range: larval dispersal and oceanographic variability. *Marine Ecology Progress Series* 410: 111-123.



- Earl, D. A., and B. M. von Holdt. 2012. STRUCTURE HARVESTER: a website and program for visualizing STRUCTURE output and implementing the Evanno method. *Conservation Genetics Resources* 4: 359-361.
- Ernst, B., J. M. Orensanz, and D. A. Armstrong. 2005. Spatial dynamics of female snow crab (*Chionoecetes opilio*) in the eastern Bering Sea. *Canadian Journal of Fisheries and Aquatic Sciences* 62: 250-268.
- Evanno, G., S. Regnaut, and J. Goudet. 2005. Detecting the number of clusters of individuals using the software STRUCTURE: a simulation study. *Molecular Ecology* 14: 2611-2620.
- Excoffier, L., and H. E. L. Lischer. 2010. Arlequin suite ver 3.5: a new series of programs to perform population genetics analyses under Linux and Windows. *Molecular Ecology Resources* 10: 564-567.
- Fonseca, D. B., B. Sainte-Marie, and F. Hazel. 2008. Longevity and change in shell condition of adult male snow crab *Chionoecetes opilio* inferred from dactyl wear and mark-recapture data. *Transactions of the American Fisheries Society* 137: 1029-1043.
- Goudet, J. 2001. FSTAT, a program to estimate and test gene diversities and fixation indices (version 2.9.3.2). Available online at: <http://www2.unil.ch/popgen/softwares/fstat.htm>
- Grant, W. S., and W. Cheng. 2012. Incorporating deep and shallow components of genetic structure into the management of Alaskan red king crab. *Evolutionary Applications* 5: 820-837.
- , S. E. Merkouris, G. H. Kruse, and L. W. Seeb. 2011. Low allozyme heterozygosity in North Pacific and Bering Sea populations of red king crab (*Paralithodes camtschaticus*): adaptive specialization, population bottleneck, or metapopulation structure? *ICES Journal of Marine Science* 68: 499-506.
- Grebmeier, J. M. 2012. Shifting patterns of life in the Pacific Arctic and Sub-Arctic seas. *Annual Review of Marine Science* 4: 63-78.
- Hardy, S. M., C. M. Carr, M. Hardman, D. Steinke, E. Corstorphine, and C. Mah. 2011. Biodiversity and phylogeography of Arctic marine fauna: insights from molecular tools. *Marine Biodiversity* 41: 195-210.
- Hubisz, M. J., D. Falush, M. Stephens, and J. K. Pritchard. 2009. Inferring weak population structure with the assistance of sample group information. *Molecular Ecology Resources* 5: 1322-1332.
- Incze, L. S., D. A. Armstrong, and S. L. Smith. 1987. Abundance of larval Tanner crabs (*Chionoecetes spp.*) in relation to adult females and regional oceanography of the Southeastern Bering Sea. *Canadian Journal of Fisheries and Aquatic Sciences* 44: 1143-1156.
- , D. L. Wencker, and D. A. Armstrong. 1984. Growth and average growth rates of Tanner crab zoeae collected from the plankton. *Marine Biology* 84: 93-100.
- Jost, L. 2008.  $G_{ST}$  and its relatives do not measure differentiation. *Molecular Ecology* 17: 4015-4026.
- Kenchington, E. L., G. C. Harding, M. W. Jones, and P. A. Prodöhl. 2009. Pleistocene glaciation events shape genetic structure across the range of the American lobster, *Homarus americanus*. *Molecular Ecology* 18: 1654-1667.
- Kogane, T., K. Hamasaki, and K. Nogami. 2005. Effect of temperature on survival and developmental period of larval snow crab *Chionoecetes opilio* (Brachyura: Majidae) reared in the laboratory. *Bulletin of the Japanese Society of Scientific Fisheries* 71: 161-164.
- Levin, L. A. 2006. Recent progress in understanding larval dispersal: new directions and digressions. *Integrative and Comparative Biology* 46: 282-297.
- Linnaeus, C. 1758. *Systema Naturae per Regna Tria Naturae, Secundum Classes, Ordines, Genera, Species, cum Characteribus, Differentiis, Synonymis, Locis* (edit. 10). Vol. 1. Laurentii Salvii, Holmiae [Stockholm]. 823 pp.
- Merkouris, S. E., L. W. Seeb, and M. C. Murphy. 1998. Low levels of genetic diversity in highly exploited populations of Alaskan Tanner crabs, *Chionoecetes bairdi*, and Alaskan and Atlantic snow crabs, *C. opilio*. *Fishery Bulletin* 96: 525-537.
- NPFMC. 2010. Stock assessment and fishery evaluation report for the King and Tanner Crab fisheries of the Bering Sea and Aleutian Islands Regions. North Pacific Fishery Management Council, Anchorage, AK, 661 pp.
- O'Connor, M. I., J. F. Bruno, S. D. Gaines, B. S. Halpern, S. E. Lester, B. P. Kinlan, and J. M. Weiss. 2007. Temperature control of larval dispersal and the implications for marine ecology, evolution, and conservation. *Proceedings of the National Academy of Sciences of the United States of America* 104: 1266-1271.
- Orensanz, J. M., B. Ernst, and D. A. Armstrong. 2007. Variation of female size and stage at maturity in snow crab (*Chionoecetes opilio*) (Brachyura: Majidae) from the eastern Bering Sea. *Journal of Crustacean Biology* 27: 576-591.
- , ———, ———, P. Stabeno, and P. Livingston. 2004. Contraction of the geographic range of distribution of snow crab (*Chionoecetes opilio*) in the Eastern Bering Sea: an environmental ratchet? *CalCOFI Report* 45: 65-79.
- Otto, R. 1998. Assessment of the Eastern Bering Sea snow crab, *Chionoecetes opilio*, stock under the terminal molting hypothesis. In *Proceedings of the North Pacific Symposium on Invertebrate Stock Assessment and Management Canadian Special Publications in Fisheries and Aquatic Sciences* 125: 109-124.
- Palsbøll, P. J., M. Bérubé, and F. W. Allendorf. 2007. Identification of management units using population genetic data. *Trends in Ecology and Evolution* 22: 11-16.
- Palumbi, S. R. 1992. Marine speciation on a small planet. *Trends in Ecology and Evolution* 7: 114-118.
- Parada, C., D. A. Armstrong, B. Ernst, S. Hinckley, and J. M. L. Orensanz. 2010. Spatial dynamics of snow crab (*Chionoecetes opilio*) in the eastern Bering Sea: putting together the pieces of the puzzle. *Bulletin of Marine Science* 86: 413-437.
- Paul, J. M., A. J. Paul, and W. E. Barber. 1997. Reproductive biology and distribution of the snow crab from the northeastern Chukchi Sea. *American Fisheries Society Symposium* 19: 287-294.
- Pickart, R. S., T. J. Weingartner, L. J. Pratt, S. Zimmermann, and D. J. Torres. 2005. Flow of winter-transformed Pacific water into the Western Arctic. *Deep-Sea Research II* 52: 3175-3198.
- Pritchard, J. K., M. Stephens, and P. Donnelly. 2000. Inference of population structure using multilocus genotype data. *Genetics* 155: 945-959.
- Puebla, O., E. Parent, and J.-M. Sévigny. 2003. New microsatellite markers for the snow crab *Chionoecetes opilio* (Brachyura: Majidae). *Molecular Ecology Notes* 3: 644-646.
- , J.-M. Sévigny, B. Sainte-Marie, J.-C. Brêthes, A. Burmeister, E. G. Dawe, and M. Moriyasu. 2008. Population genetic structure of the snow crab (*Chionoecetes opilio*) at the Northwest Atlantic scale. *Canadian Journal of Fisheries and Aquatic Sciences* 65: 425-436.
- Rand, K. M., and E. A. Logerwell. 2011. The first demersal trawl survey of benthic fish and invertebrates in the Beaufort Sea since the late 1970s. *Polar Biology* 34: 475-488.
- Rathbun, M. J. 1924. New species and subspecies of spider crabs. *Proceedings of the United States National Museum* 64: 1-5.
- Rice, W. R. 1989. Analyzing tables of statistical tests. *Evolution* 43: 223-225.
- Schindler, D. E., R. Hilborn, B. Chasco, C. P. Boatright, T. P. Quinn, L. A. Rogers, and M. S. Webster. 2010. Population diversity and the portfolio effect in an exploited species. *Nature* 465: 609-612.
- Somerton, D. A. 1981. Regional variation in the size of maturity of two species of Tanner crab (*Chionoecetes bairdi* and *Chionoecetes opilio*) in the Eastern Bering Sea, and its use in defining management subareas. *Canadian Journal of Fisheries and Aquatic Sciences* 38: 163-174.
- Sotelo, G., P. Morán, L. Fernández, and D. Posada. 2008. Genetic variation of the spiny spider crab *Maja brachydactyla* in the northeastern Atlantic. *Marine Ecology Progress Series* 362: 211-223.
- Squires, H. J. 1990. Decapod Crustacea of the Atlantic Coast of Canada. Department of Fisheries and Oceans Canada, Ottawa, ON.
- Stabeno, P. J., N. A. Bond, N. B. Kachel, S. A. Salo, and J. D. Schumacher. 2001. On the temporal variability of the physical environment over the south-eastern Bering Sea. *Fisheries Oceanography* 10: 81-98.
- Stamatis, C., A. Triantafyllidis, K. A. Moutou, and Z. Mamuris. 2004. Mitochondrial DNA variation in Northeast Atlantic and Mediterranean populations of Norway lobster, *Nephrops norvegicus*. *Molecular Ecology* 13: 1377-1390.
- Taggart, S. J., J. Mondragon, A. G. Andrews, and J. K. Nielsen. 2008. Spatial patterns and movements of red king and Tanner crabs: implications for the design of marine protected areas. *Marine Ecology-Progress Series* 365: 151-163.
- Tilesius, W. C. 1815. De Cancris Camtschaticis, Oniscis, Entomostracis et Cancellis marinis microscopicis noctiluculentibus, Cum tabulis IV: Aneaeis et appendice adnexo de Acaris et Ricinis Camtschaticis. Auctore Tilesio. Conventui exhibuit die 3 Februarii 1813. *Memoires de l'Academie Imperiale des Sciences de Saint-Petersbourg* 5.



van Oosterhout, C., W. F. Hutchinson, D. P. M. Wills, and P. Shipley. 2004. Micro-Checker: software for identifying and correcting genotyping errors in microsatellite data. *Molecular Ecology Notes* 4: 535-538.

Weingartner, T., K. Aagaard, R. Woodgate, S. Danielson, Y. Sasaki, and D. Cavalieri. 2005. Circulation on the north central Chukchi Sea shelf. *Deep Sea Research Part II: Topical Studies in Oceanography* 52: 3150-3174.

Weir, B. S., and C. C. Cockerham. 1984. Estimating F-statistics for the analysis of population structure. *Evolution* 38: 1358-1370.

Winsor, P., and D. C. Chapman. 2004. Pathways of Pacific water across the Chukchi Sea: a numerical model study. *Journal of Geophysical Research, Oceans* 109: C3.

RECEIVED: 4 June 2013.

ACCEPTED: 18 August 2013.

AVAILABLE ONLINE: 2 October 2013.

## APPENDIX

Table S1. Descriptive statistics by sample and locus, indicating the number of individuals ( $N$ ), the number of alleles ( $N_A$ ), allelic richness ( $A$ , for a common minimum sample size of 23 individuals), observed heterozygosity ( $H_O$ ), expected heterozygosity ( $H_E$ ), inbreeding coefficient ( $F_{IS}$ ) and probability ( $p$ ) of heterozygote deficit. \* Significant  $p$ -values after sequential Bonferroni correction.

|                                   | Cop2   | Cop3   | Cop4   | Cop3_4II | Cop24_3 | Cop113 | ECO106 |
|-----------------------------------|--------|--------|--------|----------|---------|--------|--------|
| <b>Pribilof Islands (PI)</b>      |        |        |        |          |         |        |        |
| $N$                               | 100    | 97     | 100    | 96       | 86      | 100    | 89     |
| $N_A$                             | 19     | 17     | 11     | 17       | 21      | 19     | 33     |
| $A$                               | 12.7   | 12.5   | 6.4    | 13.1     | 15.9    | 13.1   | 23.3   |
| $H_O$                             | 0.860  | 0.629  | 0.340  | 0.854    | 0.884   | 0.870  | 0.899  |
| $H_E$                             | 0.855  | 0.844  | 0.370  | 0.906    | 0.929   | 0.903  | 0.961  |
| $F_{IS}$                          | -0.006 | 0.256* | 0.082  | 0.057    | 0.049   | 0.037  | 0.065  |
| $p$ -value                        | 0.608  | 0.0006 | 0.107  | 0.067    | 0.080   | 0.160  | 0.008  |
| <b>Bering Sea Shelf (BR)</b>      |        |        |        |          |         |        |        |
| $N$                               | 50     | 50     | 50     | 50       | 44      | 50     | 50     |
| $N_A$                             | 19     | 16     | 6      | 17       | 17      | 13     | 30     |
| $A$                               | 13.8   | 13.5   | 4.6    | 14.5     | 14.9    | 12.2   | 23.6   |
| $H_O$                             | 0.820  | 0.880  | 0.200  | 0.960    | 0.909   | 0.860  | 0.900  |
| $H_E$                             | 0.823  | 0.878  | 0.257  | 0.914    | 0.916   | 0.889  | 0.963  |
| $F_{IS}$                          | 0.004  | -0.003 | 0.223  | -0.051   | 0.008   | 0.033  | 0.066  |
| $p$ -value                        | 0.556  | 0.615  | 0.037  | 0.960    | 0.520   | 0.336  | 0.038  |
| <b>Saint Matthew Island (SMI)</b> |        |        |        |          |         |        |        |
| $N$                               | 50     | 49     | 50     | 47       | 49      | 50     | 49     |
| $N_A$                             | 19     | 16     | 5      | 15       | 18      | 14     | 29     |
| $A$                               | 13.7   | 13.1   | 4.2    | 13.2     | 15.2    | 12.0   | 23.0   |
| $H_O$                             | 0.860  | 0.755  | 0.240  | 0.745    | 0.878   | 0.820  | 0.857  |
| $H_E$                             | 0.855  | 0.868  | 0.224  | 0.907    | 0.927   | 0.884  | 0.962  |
| $F_{IS}$                          | -0.006 | 0.131  | -0.074 | 0.181    | 0.054   | 0.073  | 0.110  |
| $p$ -value                        | 0.601  | 0.010  | 1.000  | 0.001    | 0.138   | 0.098  | 0.005  |
| <b>Chukotka Coast (CH)</b>        |        |        |        |          |         |        |        |
| $N$                               | 50     | 50     | 50     | 50       | 49      | 50     | 50     |
| $N_A$                             | 18     | 13     | 6      | 16       | 22      | 14     | 30     |
| $A$                               | 13.3   | 10.6   | 4.7    | 13.2     | 18.0    | 12.3   | 23.2   |
| $H_O$                             | 0.740  | 0.780  | 0.260  | 0.760    | 0.918   | 0.920  | 0.920  |
| $H_E$                             | 0.816  | 0.800  | 0.258  | 0.907    | 0.937   | 0.894  | 0.965  |
| $F_{IS}$                          | 0.094  | 0.026  | -0.010 | 0.164    | 0.020   | -0.029 | 0.047  |
| $p$ -value                        | 0.076  | 0.395  | 0.643  | 0.001    | 0.389   | 0.797  | 0.105  |
| <b>Point Hope (PH)</b>            |        |        |        |          |         |        |        |
| $N$                               | 29     | 29     | 29     | 29       | 25      | 28     | 28     |
| $N_A$                             | 12     | 13     | 5      | 12       | 17      | 15     | 28     |
| $A$                               | 11.1   | 12.2   | 4.6    | 11.5     | 16.4    | 13.9   | 25.9   |
| $H_O$                             | 0.793  | 0.724  | 0.172  | 0.690    | 0.880   | 0.893  | 0.893  |
| $H_E$                             | 0.826  | 0.857  | 0.283  | 0.901    | 0.931   | 0.893  | 0.974  |
| $F_{IS}$                          | 0.041  | 0.158  | 0.395  | 0.238    | 0.056   | 0.000  | 0.085  |
| $p$ -value                        | 0.379  | 0.038  | 0.010  | 0.003    | 0.233   | 0.593  | 0.039  |
| <b>Cape Lisburne (CL)</b>         |        |        |        |          |         |        |        |
| $N$                               | 39     | 39     | 39     | 38       | 39      | 39     | 39     |
| $N_A$                             | 16     | 15     | 7      | 15       | 20      | 15     | 28     |
| $A$                               | 13.4   | 12.2   | 5.3    | 14.2     | 16.9    | 13.3   | 22.7   |
| $H_O$                             | 0.821  | 0.795  | 0.231  | 0.868    | 0.872   | 0.897  | 0.872  |
| $H_E$                             | 0.848  | 0.829  | 0.281  | 0.925    | 0.934   | 0.906  | 0.957  |
| $F_{IS}$                          | 0.033  | 0.042  | 0.182  | 0.061    | 0.068   | 0.010  | 0.090  |
| $p$ -value                        | 0.388  | 0.343  | 0.098  | 0.153    | 0.107   | 0.503  | 0.016  |

Table S1. (Continued.)

|                                       | Cop2   | Cop3   | Cop4   | Cop3_4II | Cop24_3 | Cop113 | ECO106 |
|---------------------------------------|--------|--------|--------|----------|---------|--------|--------|
| SW Chukchi Shelf (SWC)                |        |        |        |          |         |        |        |
| <i>N</i>                              | 49     | 50     | 50     | 48       | 47      | 50     | 48     |
| <i>N<sub>A</sub></i>                  | 17     | 15     | 5      | 17       | 19      | 14     | 30     |
| <i>A</i>                              | 12.9   | 13.0   | 4.1    | 14.7     | 16.1    | 11.7   | 23.1   |
| <i>H<sub>O</sub></i>                  | 0.816  | 0.900  | 0.180  | 0.813    | 0.936   | 0.920  | 0.938  |
| <i>H<sub>E</sub></i>                  | 0.836  | 0.868  | 0.240  | 0.923    | 0.931   | 0.885  | 0.961  |
| <i>F<sub>IS</sub></i>                 | 0.024  | -0.037 | 0.251  | 0.121    | -0.005  | -0.039 | 0.025  |
| <i>p</i> -value                       | 0.401  | 0.836  | 0.030  | 0.008    | 0.630   | 0.849  | 0.280  |
| Wrangel Island (WI)                   |        |        |        |          |         |        |        |
| <i>N</i>                              | 25     | 26     | 26     | 26       | 24      | 26     | 23     |
| <i>N<sub>A</sub></i>                  | 16     | 14     | 4      | 15       | 16      | 14     | 24     |
| <i>A</i>                              | 15.4   | 13.5   | 3.8    | 14.8     | 15.7    | 13.6   | 24.0   |
| <i>H<sub>O</sub></i>                  | 0.880  | 0.808  | 0.154  | 0.923    | 0.958   | 0.962  | 0.870  |
| <i>H<sub>E</sub></i>                  | 0.878  | 0.878  | 0.149  | 0.934    | 0.931   | 0.916  | 0.964  |
| <i>F<sub>IS</sub></i>                 | -0.003 | 0.081  | -0.036 | 0.012    | -0.030  | -0.051 | 0.100  |
| <i>p</i> -value                       | 0.633  | 0.181  | 1.000  | 0.519    | 0.824   | 0.907  | 0.041  |
| NW Chukchi Shelf (NWC)                |        |        |        |          |         |        |        |
| <i>N</i>                              | 50     | 50     | 50     | 47       | 38      | 50     | 49     |
| <i>N<sub>A</sub></i>                  | 13     | 15     | 6      | 15       | 20      | 15     | 27     |
| <i>A</i>                              | 10.6   | 13.1   | 5.0    | 13.6     | 16.9    | 12.8   | 21.9   |
| <i>H<sub>O</sub></i>                  | 0.900  | 0.780  | 0.320  | 0.894    | 0.921   | 0.800  | 0.939  |
| <i>H<sub>E</sub></i>                  | 0.838  | 0.883  | 0.322  | 0.917    | 0.932   | 0.892  | 0.960  |
| <i>F<sub>IS</sub></i>                 | -0.075 | 0.118  | 0.007  | 0.026    | 0.012   | 0.104  | 0.022  |
| <i>p</i> -value                       | 0.949  | 0.024  | 0.554  | 0.356    | 0.452   | 0.042  | 0.333  |
| N Chukchi Shelf (NC)                  |        |        |        |          |         |        |        |
| <i>N</i>                              | 24     | 24     | 24     | 24       | 23      | 24     | 24     |
| <i>N<sub>A</sub></i>                  | 15     | 15     | 4      | 12       | 15      | 13     | 22     |
| <i>A</i>                              | 14.7   | 14.7   | 4.0    | 11.9     | 15.0    | 12.8   | 21.6   |
| <i>H<sub>O</sub></i>                  | 0.958  | 0.792  | 0.208  | 0.958    | 0.957   | 0.875  | 0.958  |
| <i>H<sub>E</sub></i>                  | 0.873  | 0.870  | 0.269  | 0.897    | 0.906   | 0.895  | 0.957  |
| <i>F<sub>IS</sub></i>                 | -0.100 | 0.091  | 0.228  | -0.070   | -0.057  | 0.023  | -0.001 |
| <i>p</i> -value                       | 0.978  | 0.165  | 0.130  | 0.929    | 0.895   | 0.474  | 0.663  |
| Beaufort Sea site 7 (BF7)             |        |        |        |          |         |        |        |
| <i>N</i>                              | 73     | 72     | 73     | 72       | 72      | 73     | 70     |
| <i>N<sub>A</sub></i>                  | 16     | 17     | 6      | 17       | 21      | 16     | 34     |
| <i>A</i>                              | 11.6   | 12.2   | 4.2    | 13.1     | 16.1    | 12.0   | 23.2   |
| <i>H<sub>O</sub></i>                  | 0.836  | 0.806  | 0.233  | 0.861    | 0.944   | 0.877  | 0.900  |
| <i>H<sub>E</sub></i>                  | 0.839  | 0.863  | 0.271  | 0.895    | 0.929   | 0.888  | 0.962  |
| <i>F<sub>IS</sub></i>                 | 0.004  | 0.067  | 0.143  | 0.038    | -0.017  | 0.013  | 0.065  |
| <i>p</i> -value                       | 0.526  | 0.086  | 0.081  | 0.228    | 0.773   | 0.423  | 0.015  |
| Beaufort Sea other sites pooled (BFP) |        |        |        |          |         |        |        |
| <i>N</i>                              | 32     | 30     | 32     | 32       | 30      | 32     | 30     |
| <i>N<sub>A</sub></i>                  | 13     | 12     | 6      | 13       | 13      | 13     | 26     |
| <i>A</i>                              | 11.6   | 11.7   | 5.3    | 12.3     | 12.7    | 11.3   | 22.7   |
| <i>H<sub>O</sub></i>                  | 0.750  | 0.867  | 0.250  | 0.969    | 0.833   | 0.938  | 0.800  |
| <i>H<sub>E</sub></i>                  | 0.810  | 0.885  | 0.261  | 0.884    | 0.895   | 0.874  | 0.931  |
| <i>F<sub>IS</sub></i>                 | 0.075  | 0.021  | 0.042  | -0.098   | 0.071   | -0.075 | 0.142  |
| <i>p</i> -value                       | 0.224  | 0.458  | 0.464  | 0.983    | 0.201   | 0.939  | 0.005  |
